# Supplementary material
Source: MDPI journal article supplement (https://www.mdpi.com/2073-4441/13/1/93)
Supplement: s1 [file s1]

## Sheet: Foglio1
Date	Daily Precipitation Pg (TREVI)	T	EC
dd/mm/yyyy	mm	°C	mS/cm
2015-01-28	0	7.5	287
2015-01-29	25.8	7.5	286.792
2015-01-30	79.4	7.58333	288.5
2015-01-31	9.8	7.90417	294.167
2015-02-01	0.6	7.94167	297.5
2015-02-02	7	7.8125	295.542
2015-02-03	18.6	7.75417	293.958
2015-02-04	34	7.7	293.667
2015-02-05	51	7.7	295.545
2015-02-06	12.6	7.86364	300.545
2015-02-07	2	7.9	302
2015-02-08	0.2	7.82917	301.333
2015-02-09	0	7.8	299.875
2015-02-10	0	7.8	298.458
2015-02-11	0	7.725	297.167
2015-02-12	0	7.7	296.25
2015-02-13	0	7.7	295.208
2015-02-14	0	7.65833	295
2015-02-15	1.8	7.6	294.125
2015-02-16	8.8	7.6	294
2015-02-17	0	7.6	293.458
2015-02-18	0	7.6	293
2015-02-19	0	7.6	293
2015-02-20	0	7.6	293
2015-02-21	2.8	7.6	292.083
2015-02-22	19.6	7.6	292
2015-02-23	1.2	7.61667	292
2015-02-24	3	7.7	291.625
2015-02-25	0.4	7.7	292
2015-02-26	0.2	7.7	291.208
2015-02-27	11	7.7	291
2015-02-28	0	7.7	290.292
2015-03-01	0.2	7.7	290
2015-03-02	6.4	7.68333	290.083
2015-03-03	0.2	7.6	289.75
2015-03-04	18	7.6	289
2015-03-05	19	7.6	288.75
2015-03-06	0	7.61667	287.333
2015-03-07	0	7.7	288.333
2015-03-08	0	7.7	289.167
2015-03-09	0	7.67083	290
2015-03-10	0	7.6	290
2015-03-11	0	7.6	289.542
2015-03-12	0.8	7.6	289.292
2015-03-13	0	7.6	289
2015-03-14	0	7.6	289.208
2015-03-15	11.4	7.6	289.417
2015-03-16	30	7.6	289
2015-03-17	8.2	7.6	288.917
2015-03-18	0	7.65417	285.333
2015-03-19	0.2	7.7	286.75
2015-03-20	0	7.6875	288
2015-03-21	0	7.6	288
2015-03-22	1.8	7.6	288
2015-03-23	2	7.6	288
2015-03-24	0	7.6	288
2015-03-25	65	7.6125	288.167
2015-03-26	0	7.85	273.042
2015-03-27	4.8	7.86667	285.917
2015-03-28	0	7.8	286.542
2015-03-29	0	7.7375	286.542
2015-03-30	0	7.7375	287.75
2015-03-31	0.2	7.7375	288
2015-04-01	0	7.6625	287.333
2015-04-02	0	7.6	286
2015-04-03	0	7.6	286
2015-04-08	0	7.5	287
2015-04-15	0	7.5	285
2015-04-16	0	7.5	285
2015-05-11	0	7.3	279
2015-05-12	0	7.3	279
2015-05-13	0	7.3	279
2015-05-14	0	7.3	279
2015-05-15	0	7.3	279
2015-05-16	0.8	7.3	279
2015-05-17	0	7.3	279
2015-05-18	0	7.3	279
2015-05-19	0	7.3	279
2015-05-20	0.4	7.3	279
2015-05-21	1.8	7.3	279
2015-05-22	12.2	7.3	279
2015-05-23	6.4	7.3	279
2015-05-24	0.2	7.3	279
2015-05-25	0	7.3	279
2015-05-26	5	7.3	279
2015-05-27	6.8	7.3	279
2015-05-28	0	7.3	279
2015-05-29	0	7.3	279
2015-05-30	0	7.3	279
2015-05-31	0.4	7.3	279
2015-06-01	0.2	7.3	279
2015-06-02	0.4	7.3	279
2015-06-03	0	7.3	279
2015-06-04	0	7.3	279
2015-06-05	0	7.3	279
2015-06-06	0	7.3	279.417
2015-06-07	0	7.3	279.625
2015-06-08	15.6	7.3	280
2015-06-09	7.4	7.3	280
2015-06-10	0	7.3	280
2015-06-11	0	7.3	280
2015-06-12	0	7.3	280
2015-06-13	0.2	7.3	280
2015-06-14	0	7.3	280
2015-06-15	0.2	7.3	280
2015-06-16	0.2	7.3	280
2015-06-17	7.2	7.3	280
2015-06-18	0.2	7.3	280
2015-06-19	0	7.3	280
2015-06-20	2.2	7.3	280
2015-06-21	0.2	7.3	280
2015-06-22	0	7.3	280
2015-06-23	0	7.3	280
2015-06-24	7.8	7.3	280
2015-06-25	0.2	7.3	280
2015-06-26	0	7.3	280
2015-06-27	0	7.3	280
2015-06-28	0	7.3	280
2015-06-29	0.2	7.3	280
2015-06-30	0	7.3	280
2015-07-01	0	7.3	280
2015-07-02	0	7.3	280
2015-07-03	0	7.3	280.375
2015-07-04	0	7.3	281
2015-07-05	4.2	7.3	281
2015-07-06	0.2	7.3	281
2015-07-07	1.6	7.3	281.417
2015-07-08	0	7.3	282
2015-07-09	0	7.3	282
2015-07-10	0	7.3	281.792
2015-07-11	0	7.3	281.25
2015-07-12	0	7.3	281
2015-07-13	0	7.3	281
2015-07-14	1.8	7.3	281
2015-07-15	6.8	7.3	281
2015-07-16	0	7.3	281.042
2015-07-17	0	7.3	281.875
2015-07-18	0	7.3	282
2015-07-19	0	7.3	282
2015-07-20	0	7.3	282
2015-07-21	28	7.3	282.542
2015-07-22	38.8	7.31667	283
2015-07-23	0	7.35	283
2015-07-24	16.4	7.36667	282.792
2015-07-25	0.2	7.3375	282
2015-07-26	0	7.32917	282
2015-07-27	0	7.3	282
2015-07-28	0	7.3	282
2015-07-29	0	7.32083	282
2015-07-30	0.4	7.31667	282
2015-07-31	0.2	7.31667	282
2015-08-01	0	7.32917	282
2015-08-02	0	7.3	282
2015-08-03	0	7.35417	282
2015-08-04	0	7.37083	282
2015-08-05	6.4	7.4	282
2015-08-06	0.2	7.4	282.333
2015-08-07	3.4	7.4	282.417
2015-08-08	10.8	7.4	283
2015-08-09	4	7.4	283.167
2015-08-10	0.4	7.4	284
2015-08-11	15.6	7.4	283.833
2015-08-12	0	7.4	283
2015-08-13	11.4	7.4	283
2015-08-14	0	7.4	283
2015-08-15	0	7.4	283
2015-08-16	3.4	7.4	283
2015-08-17	0	7.4	283
2015-08-18	0	7.4	283
2015-08-19	13.6	7.4	283
2015-08-20	0.2	7.4	283
2015-08-21	0	7.4	283
2015-08-22	0	7.4	283
2015-08-23	0.2	7.4	283
2015-08-24	0	7.4	283
2015-08-25	0	7.4	283
2015-08-26	0	7.4	283
2015-08-27	0	7.4	283
2015-08-28	0	7.4	283
2015-08-29	0	7.4	283
2015-08-30	0	7.4	283
2015-08-31	0	7.4	283
2015-09-01	0	7.4	283
2015-09-02	0	7.4	283.042
2015-09-03	0	7.4	283.167
2015-09-04	1.2	7.4	283.458
2015-09-05	17	7.4	283.792
2015-09-06	0	7.4	284
2015-09-07	0.2	7.4	284
2015-09-08	0	7.4	284
2015-09-09	0	7.4	284
2015-09-10	0	7.4	284
2015-09-11	0	7.4	284
2015-09-12	0	7.4	284
2015-09-13	7.8	7.4	284
2015-09-14	3.8	7.4	284
2015-09-15	0.4	7.4	284
2015-09-16	0	7.4	284
2015-09-17	0	7.4	284.417
2015-09-18	0	7.4	284
2015-09-19	0	7.4	284
2015-09-20	4.4	7.4	284.167
2015-09-21	0	7.4	284
2015-09-22	0	7.4	284
2015-09-23	20.6	7.4	284.042
2015-09-24	0.8	7.4	284
2015-09-25	0.2	7.4	284
2015-09-26	0	7.4	284
2015-09-27	0	7.4	284
2015-09-28	1.2	7.4	284.083
2015-09-29	0	7.4	284
2015-09-30	0	7.4	284.458
2015-10-01	19.8	7.4	285
2015-10-02	16.8	7.4	285
2015-10-03	0.2	7.4	285
2015-10-04	0	7.4	285
2015-10-05	1.6	7.4	285
2015-10-06	2.2	7.4	285
2015-10-07	7.8	7.4	285
2015-10-08	2	7.4	285
2015-10-09	3.8	7.4	285
2015-10-10	28.8	7.4	285
2015-10-11	0.4	7.4	285
2015-10-12	0	7.4	285
2015-10-13	53.4	7.4	285
2015-10-14	143.4	7.45	284.333
2015-10-15	0.4	7.77083	269.25
2015-10-16	0.4	7.875	180.708
2015-10-17	6.2	8.18333	70.8333
2015-10-18	2.4	7.6	285
2015-10-19	20.8	7.52917	284.625
2015-10-20	0.2	7.5	284
2015-10-21	0.4	7.5	285.5
2015-10-22	0.2	7.5	284.042
2015-10-23	0	7.5	284
2015-10-24	0	7.5	284.04
2015-10-25	0	7.43333	284
2015-10-26	0	7.4	284
2015-10-27	0	7.4	284
2015-10-28	11.4	7.4	284.042
2015-10-29	7	7.4	284
2015-10-30	0.8	7.4	284
2015-10-31	0	7.4	284
2015-11-01	0	7.4	284.542
2015-11-02	0	7.4	284
2015-11-03	0	7.4	284
2015-11-04	0.2	7.4	284
2015-11-05	0.2	7.4	284
2015-11-06	0.2	7.4	284
2015-11-07	0.2	7.4	284
2015-11-08	0	7.4	284
2015-11-09	0	7.4	284
2015-11-10	0	7.4	284
2015-11-11	0	7.4	284
2015-11-12	0	7.4	284
2015-11-13	0	7.4	285.958
2015-11-14	0	7.4	284
2015-11-15	0	7.4	284
2015-11-16	0	7.4	284
2015-11-17	0	7.4	284
2015-11-18	0	7.4	284
2015-11-19	0.2	7.4	284
2015-11-20	0.2	7.4	284
2015-11-21	42.6	7.4	284
2015-11-22	13.6	7.4	283.958
2015-11-23	11.2	7.4	283.625
2015-11-24	2.4	7.4	283.958
2015-11-25	0.2	7.4	285.042
2015-11-26	2.8	7.4	285
2015-11-27	0	7.4	285
2015-11-28	0	7.4	285
2015-11-29	0	7.4	285
2015-11-30	0	7.4	286.542
2015-12-01	0	7.4	303.13
2015-12-02	0	7.4	288.042
2015-12-03	0.2	7.4	285.577
2015-12-04	0	7.4	289.125
2015-12-05	0	7.4	301.917
2015-12-06	0	7.4	299.792
2015-12-07	0.2	7.4	285.875
2015-12-08	0	7.4	284.417
2015-12-09	0	7.4	287.667
2015-12-10	0	7.4	284.042
2015-12-11	0	7.4	284
2015-12-12	0	7.4	284
2015-12-13	0	7.4	284
2015-12-14	0	7.4	284
2015-12-15	0	7.4	284
2015-12-16	0	7.4	284
2015-12-17	0	7.4	284
2015-12-18	0	7.4	284
2015-12-19	0	7.4	284
2015-12-20	0.2	7.4	284
2015-12-21	0	7.4	284
2015-12-22	0	7.4	284.625
2015-12-23	0	7.4	284.042
2015-12-24	0.2	7.4	284.125
2015-12-25	0.2	7.4	284.208
2015-12-26	0	7.4	284.917
2015-12-27	0	7.4	284.083
2015-12-28	0	7.4	284.25
2015-12-29	0	7.4	284.25
2015-12-30	0	7.4	284
2015-12-31	0.2	7.4	284.042
2016-01-01	0	7.4	284.125
2016-01-02	12	7.4	284.083
2016-01-03	19.2	7.4	284.083
2016-01-04	17	7.4	284.167
2016-01-05	17.4	7.4	284
2016-01-06	21.6	7.4	284.375
2016-01-07	3.6	7.44167	285.75
2016-01-08	0.4	7.5	289.208
2016-01-09	0	7.5	297.667
2016-01-10	10	7.5	310.042
2016-01-11	21.4	7.5	286.167
2016-01-12	5.4	7.5	293.375
2016-01-13	2.2	7.5	301.667
2016-01-14	14	7.55417	292.25
2016-01-15	33.8	7.6	296.375
2016-01-16	0	7.65833	289.625
2016-01-17	0	7.7	290.75
2016-01-18	0	7.7	291.5
2016-01-19	0	7.6125	290.958
2016-01-20	0.8	7.6	287.125
2016-01-21	5	7.6	286.292
2016-01-22	0	7.52917	287.083
2016-01-23	0.2	7.5	290.333
2016-01-24	0	7.5	288.833
2016-01-25	0	7.5	285.625
2016-01-26	0	7.5	285.083
2016-01-27	0	7.5	285
2016-01-28	0	7.5	286.583
2016-01-29	0	7.5	286.208
2016-01-30	0	7.5	296.5
2016-01-31	3.4	7.5	285.792
2016-02-01	0.2	7.5	286.417
2016-02-02	0.2	7.5	285.208
2016-02-03	1.6	7.5	285.083
2016-02-04	2.2	7.5	285
2016-02-05	0	7.5	285
2016-02-06	0	7.5	285
2016-02-07	0.6	7.5	285
2016-02-08	2.4	7.5	285
2016-02-09	6.2	7.47917	285
2016-02-10	52.2	7.4	285.167
2016-02-11	7.8	7.49583	285.792
2016-02-12	19	7.5	284.875
2016-02-13	20	7.50833	286.167
2016-02-14	23.2	7.60417	287.5
2016-02-15	36.6	7.75	289.583
2016-02-16	0.2	7.9	289.417
2016-02-17	0	7.85833	293.125
2016-02-18	5.8	7.8	291.958
2016-02-19	0.4	7.70833	290.292
2016-02-20	0.6	7.7	289.458
2016-02-21	0	7.6125	288.625
2016-02-22	0	7.6	288
2016-02-23	0	7.6	288
2016-02-24	0	7.6	287.292
2016-02-25	10.2	7.6	287
2016-02-26	7.8	7.6	287
2016-02-27	5.6	7.5	287
2016-02-28	35.8	7.5	286.042
2016-02-29	28.8	7.56667	286.458
2016-03-01	2.8	7.7875	288.042
2016-03-02	2	7.8	290.875
2016-03-03	18.4	7.74583	290.208
2016-03-04	3.6	7.7	290
2016-03-05	16.6	7.7	290.042
2016-03-06	0.2	7.7	290.25
2016-03-07	7.2	7.7	289.625
2016-03-08	5	7.7	290.667
2016-03-09	14.2	7.7	290.75
2016-03-10	6.2	7.7	290.292
2016-03-11	0.2	7.69167	290.208
2016-03-12	0	7.6	290
2016-03-13	0.4	7.6	289.792
2016-03-14	0	7.6	289
2016-03-15	1	7.6	288.542
2016-03-16	0	7.6	288.375
2016-03-17	0	7.6	288
